# Supplementary material
Source: PubMed Central journal article supplement (PMC8033616)
Supplement: pt0c00065_si_001.pdf [file pt0c00065_si_001.pdf]

# Transient Stimulation with Psychoplastogens is Sufficient to Initiate Neuronal Growth

## Supplemental Material

*(3 pages)*

Calvin Ly,<sup>1</sup> Alexandra C. Greb,<sup>1</sup> Maxemiliano V. Vargas,<sup>2</sup> Whitney C. Duim,<sup>1</sup>  
Ana Cristina G. Grodzki,<sup>3</sup> Pamela J. Lein,<sup>3</sup> David E. Olson<sup>1,4,5\*</sup>

<sup>1</sup> Department of Chemistry, University of California, Davis, One Shields Avenue, Davis, CA 95616, USA

<sup>2</sup> Neuroscience Graduate Program, University of California, Davis, Davis, CA 95618, USA

<sup>3</sup> Department of Molecular Biosciences, School of Veterinary Medicine, University of California, Davis, 1089 Veterinary Medicine Drive, Davis, CA 95616, USA

<sup>4</sup> Department of Biochemistry & Molecular Medicine, School of Medicine, University of California, Davis, 2700 Stockton Blvd, Suite 2102, Sacramento, CA 95817, USA

<sup>5</sup> Center for Neuroscience, University of California, Davis, 544 Newton Ct, Davis, CA 95618, USA

\* Contact; deolson@ucdavis.edu; ORCID 0000-0002-4517-0543

## TABLE OF CONTENTS

*Figure S1*    *Page S3*

*Figure S2*    *Page S3*

*Figure S3*    *Page S3*

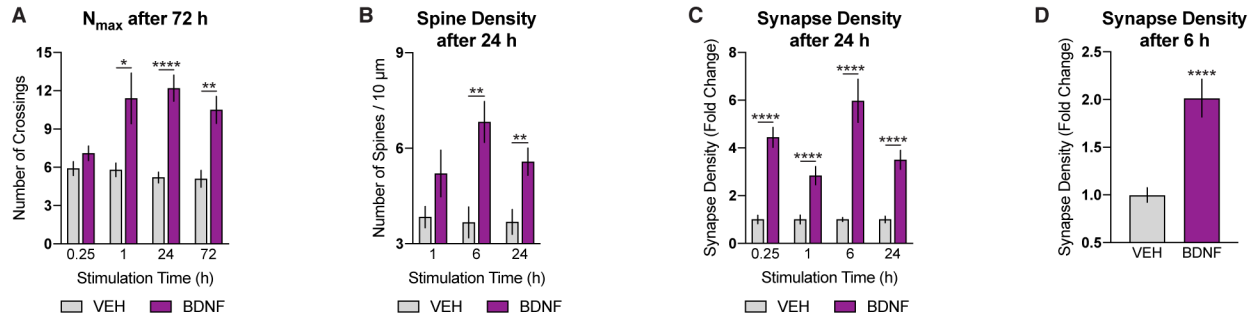

**Figure S1. Transient stimulation with BDNF is sufficient to induce growth of cortical neurons, Related to Figure 1.** (A) Cortical cultures (DIV3) were treated with BDNF (50 ng/mL) for short periods of time and then allowed to grow for a total of 72 h. Maximum number of crossings ( $N_{max}$ ) of the Sholl plots are presented as a measure of dendritic arbor complexity ( $n = 10$  neurons). (B) Cortical cultures (DIV19) were treated with BDNF (50 ng/mL) for short periods of time and then allowed to grow for a total of 24 h before dendritic spine density was assessed. (C) Cortical cultures (DIV19) were treated with BDNF (50 ng/mL) for short periods of time and then allowed to grow for a total of 24 h before synapse density was assessed via colocalization of pre- and postsynaptic markers (VGLUT1 and PSD-95, respectively). (D) Cortical cultures (DIV19) were treated with BDNF (50 ng/mL) for 6 h before synapse density was assessed. Data are represented as mean  $\pm$  SEM. \* $p < 0.05$ , \*\* $p < 0.01$ , \*\*\* $p < 0.001$ , \*\*\*\* $p < 0.0001$ , as compared to VEH control. For A–C, multiple t tests were performed and p values were corrected for multiple comparisons using the Holm-Sidak method. For D, a one-way analysis of variance with Dunnett's post hoc test was utilized. VEH = vehicle.

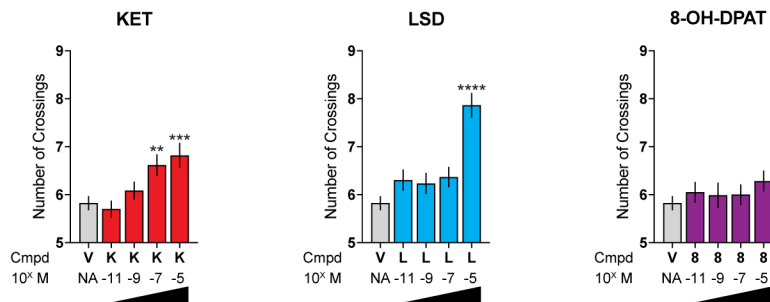

**Figure S2. Transient stimulation with psychoplastogens increases dendritic growth in a concentration-dependent manner, related to Figure 1.** Cortical cultures (DIV3) were treated with compounds at various concentrations for 1 h and then allowed to grow for a total of 72 h. The maximum number of crossings ( $N_{max}$ ) of the resulting Sholl plots are shown. Data are represented as mean  $\pm$  SEM ( $n = 52$ –136 neurons). \* $p < 0.05$ , \*\* $p < 0.01$ , \*\*\* $p < 0.001$ , \*\*\*\* $p < 0.0001$ , as compared to VEH control following a one-way analysis of variance with Dunnett's post hoc test. V = vehicle; K = KET = ketamine; L = LSD = lysergic acid diethylamide; 8 = 8-OH-DPAT = 7-(Dipropylamino)-5,6,7,8-tetrahydronaphthalen-1-ol. See also Figure 1.

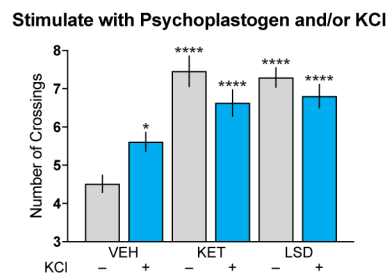

**Figure S3. Stimulation with Potassium Does Not Produce Psychoplastogen-Like Effects on Dendritogenesis, Related to Figure 4.** Cortical cultures (DIV3) were treated with psychoplastogens (10  $\mu$ M) for 1 h in the presence or absence of KCl (40 mM) and then allowed to grow for 71 h. The maximum number of crossings ( $N_{max}$ ) of the resulting Sholl plots are shown. Data are represented as mean  $\pm$  SEM ( $n = 35$ –41 neurons). \* $p < 0.05$ , \*\* $p < 0.01$ , \*\*\* $p < 0.001$ , \*\*\*\* $p < 0.0001$ , as compared to VEH control without KCl following a one-way analysis of variance with Dunnett's post hoc test. VEH = vehicle; KET = ketamine; LSD = lysergic acid diethylamide; KCl = potassium chloride. See also Figure 4.
